# Supplementary material for: Heterotrimetallic paramagnetic complex of ring reduced tin(ii) hexadecachlorophthalocyanine
Source: Royal Society of Chemistry journal article supplement (doi:10.1039/d3nj00506b), 2023-01-01
Supplement: d3nj00506b1.pdf [file d3nj00506b1.pdf]

## Supporting information

### **Heterotrimetallic paramagnetic complex of ring reduced tin (II) hexadecachlorophthalocyanine**

Nikita R. Romanenko<sup>a</sup>, Maxim A. Faraonov<sup>a</sup>, Nikita G. Osipov<sup>a</sup>, Alexey V. Kuzmin<sup>b</sup>,  
Salavat S. Khasanov<sup>b</sup>, Akihiro Otsuka<sup>c</sup>, Hideki Yamochi<sup>c</sup>, Hiroshi Kitagawa<sup>c</sup>,  
Dmitri V. Konarev<sup>a</sup>

<sup>a</sup>Federal Research Center of Problems of Chemical Physics and Medical Chemistry  
RAS, Chernogolovka, Moscow region, 142432, Russia

<sup>b</sup>Institute of Solid State Physics RAS, Chernogolovka, Moscow region, 142432, Russia

<sup>c</sup>Division of Chemistry, Graduate School of Science, Kyoto University, Sakyo-ku,  
Kyoto 606-8502, Japan

*Corresponding author E-mail: maksimfaraonov@yandex.ru, konarev3@yandex.ru*

## Optical properties

**Table S1.** IR-spectra (cm<sup>-1</sup>) of starting macrocycle and salts **1** and **2** measured in KBr pellets.

| Components                           | cryptand | {CpFe(CO) <sub>2</sub> } <sub>2</sub> | C <sub>6</sub> H <sub>4</sub> Cl <sub>2</sub> | SnCl <sub>2</sub> PcCl <sub>16</sub> | Cp <sub>2</sub> Cr | <b>1</b> | <b>2</b> |
|--------------------------------------|----------|---------------------------------------|-----------------------------------------------|--------------------------------------|--------------------|----------|----------|
| SnCl <sub>2</sub> PcCl <sub>16</sub> |          |                                       |                                               | 518s                                 |                    | -        | 515s     |
|                                      |          |                                       |                                               | 540w                                 |                    | -        | -        |
|                                      |          |                                       |                                               | 605w                                 |                    | 599w*    | 598w     |
|                                      |          |                                       |                                               | 644w                                 |                    | -        | -        |
|                                      |          |                                       |                                               | 667w                                 |                    | 658w*    | -        |
|                                      |          |                                       |                                               | 738s                                 |                    | 723m     | 716m     |
|                                      |          |                                       |                                               | 767s                                 |                    | 763s     | 759s*    |
|                                      |          |                                       |                                               | 787s                                 |                    | 779m     | 785s     |
|                                      |          |                                       |                                               | 795s                                 |                    | -        | -        |
|                                      |          |                                       |                                               | 817w                                 |                    | 811w     | 814w     |
|                                      |          |                                       |                                               | 828w                                 |                    | -        | -        |
|                                      |          |                                       |                                               | 861w                                 |                    | 856w     | -        |
|                                      |          |                                       |                                               | 896w                                 |                    | -        | -        |
|                                      |          |                                       |                                               | 945s                                 |                    | 945m     | 949s*    |
|                                      |          |                                       |                                               | 969m                                 |                    | -        | -        |
|                                      |          |                                       |                                               | 1022w                                |                    | -        | 1032m*   |
|                                      |          |                                       |                                               | 1093s                                |                    | 1084m    | -        |
|                                      |          |                                       |                                               | 1134s                                |                    | 1134s    | 1132s*   |
|                                      |          |                                       |                                               | 1203s                                |                    | 1208m    | 1204w*   |
|                                      |          |                                       |                                               | 1273s                                |                    | 1273m    | 1263s    |
|                                      |          |                                       |                                               | 1296s                                |                    | 1302s    | 1304s*   |
|                                      |          |                                       |                                               | 1332s                                |                    | -        | -        |
|                                      |          |                                       |                                               | 1387s                                |                    | 1387m    | 1393s    |
|                                      |          |                                       |                                               | 1450w                                |                    | 1456m*   | 1454m*   |
|                                      |          |                                       |                                               | 1474w                                |                    | -        | 1474w    |
|                                      |          |                                       |                                               | 1503w                                |                    | -        | -        |
|                                      |          |                                       |                                               | 1561w                                |                    | 1570w    | 1560w    |
|                                      |          |                                       |                                               | 1590w                                |                    | -        | -        |
|                                      |          |                                       |                                               | 1630w                                |                    | 1630w    | -        |
|                                      |          |                                       |                                               | 2349w                                |                    | -        | -        |
|                                      |          |                                       |                                               | 2373w                                |                    | -        | -        |
|                                      |          |                                       |                                               | 2420w                                |                    | -        | -        |
|                                      |          |                                       |                                               | 2546w                                |                    | -        | -        |
|                                      |          |                                       |                                               | 2585w                                |                    | -        | -        |
|                                      |          |                                       | 2624w                                         |                                      | -                  | -        |          |
|                                      |          |                                       | 2850w                                         |                                      | 2855w*             | -        |          |
|                                      |          |                                       | 2875w                                         |                                      | -                  | 2882m*   |          |
|                                      |          |                                       | 2922w                                         |                                      | 2914w              | -        |          |
|                                      |          |                                       | 2959w                                         |                                      | -                  | -        |          |
| cryptand                             | 476w     |                                       |                                               |                                      |                    |          | 473w     |
|                                      | 528w     |                                       |                                               |                                      |                    |          | -        |
|                                      | 581w     |                                       |                                               |                                      |                    |          | -        |
|                                      | 735m     |                                       |                                               |                                      |                    |          | -        |
|                                      | 922m     |                                       |                                               |                                      |                    |          | -        |
|                                      | 948w     |                                       |                                               |                                      |                    |          | 949s*    |
|                                      | 982m     |                                       |                                               |                                      |                    |          | -        |
|                                      | 1038w    |                                       |                                               |                                      |                    |          | 1032m*   |
|                                      | 1071m    |                                       |                                               |                                      |                    |          | 1076s    |
|                                      | 1100s    |                                       |                                               |                                      |                    |          | 1105s    |
|                                      | 1127s    |                                       |                                               |                                      |                    |          | 1132s*   |
|                                      | 1213w    |                                       |                                               |                                      |                    |          | 1204w*   |
|                                      | 1295m    |                                       |                                               |                                      |                    |          | 1304s*   |
|                                      | 1329m    |                                       |                                               |                                      |                    |          | -        |
|                                      | 1360s    |                                       |                                               |                                      |                    |          | 1354m    |
|                                      | 1446m    |                                       |                                               |                                      |                    |          | 1454m*   |
|                                      | 1462m    |                                       |                                               |                                      |                    |          | -        |
|                                      | 1490w    |                                       |                                               |                                      |                    |          | -        |
|                                      | 2790w    |                                       |                                               |                                      |                    |          | -        |
|                                      | 2877w    |                                       |                                               |                                      |                    |          | 2882m*   |
| 2943w                                |          |                                       |                                               |                                      |                    | -        |          |

|                                                   |  |                                                                                         |                                         |  |                                                                                      |                                                                      |                                        |
|---------------------------------------------------|--|-----------------------------------------------------------------------------------------|-----------------------------------------|--|--------------------------------------------------------------------------------------|----------------------------------------------------------------------|----------------------------------------|
| C <sub>6</sub> H <sub>4</sub> Cl <sub>2</sub>     |  |                                                                                         | 663w<br>751s<br>1035m<br>1120s<br>1462m |  |                                                                                      | 658w*<br>-<br>1034m<br>-<br>1456m*                                   | 656w<br>758s*<br>1032m*<br>-<br>1454m* |
| Cp <sub>2</sub> Fe <sub>2</sub> (CO) <sub>4</sub> |  | 542w<br>565w<br>595w<br>648m<br>830w<br>1016w<br>CO<br>1756s<br>1771s<br>1936s<br>1956s |                                         |  |                                                                                      | -<br>-<br>599w*<br>658w*<br>-<br>-<br>-<br>CO<br>-<br>1983s<br>2026s |                                        |
| Cp <sub>2</sub> Cr                                |  |                                                                                         |                                         |  | 587w<br>800w<br>1019m<br>1067w<br>1262w<br>1375m<br>1417w<br>1446w<br>2851w<br>2955w | 579m<br>-<br>-<br>-<br>-<br>-<br>-<br>1456m*<br>2855w*<br>-          |                                        |

\* - bands are coincided, w – weak, m –middle and s – strong intensity

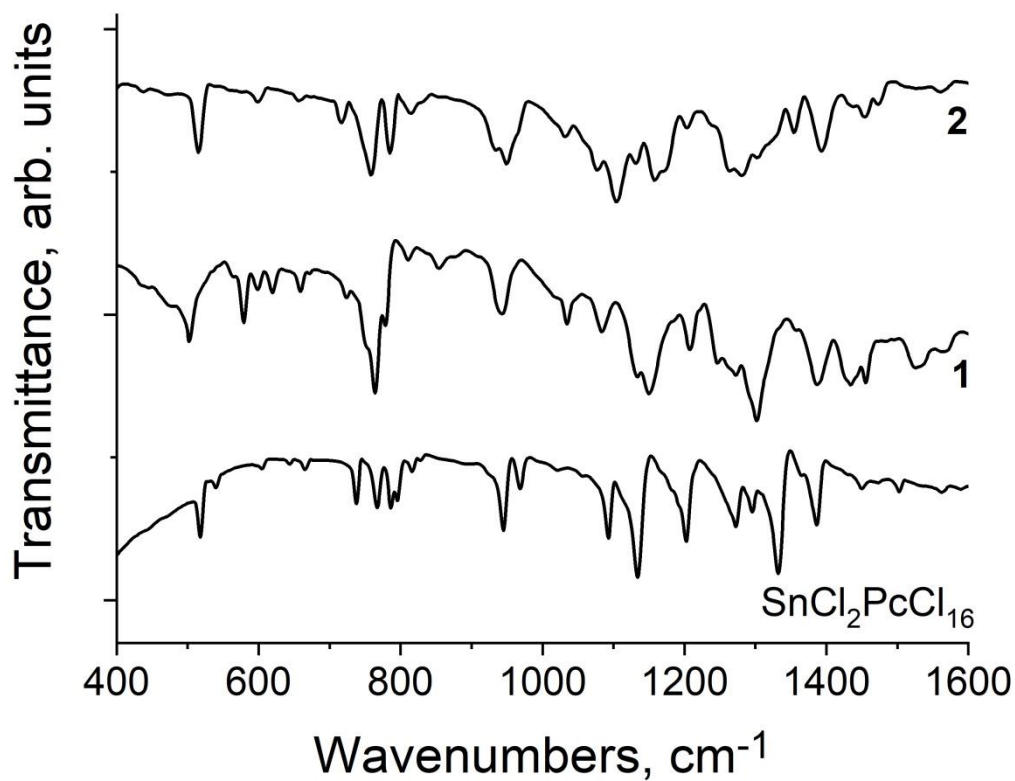

**Figure S1.** IR spectra of pristine neutral SnCl<sub>2</sub>PcCl<sub>16</sub> and salts **1** and **2** in KBr pellets prepared in anaerobic condition.

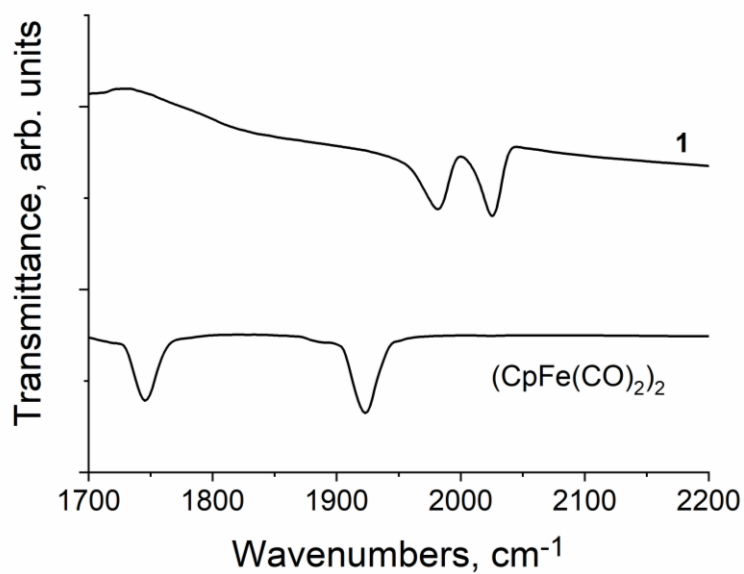

**Figure S2.** IR spectra of starting (CpFe(CO)<sub>2</sub>)<sub>2</sub> and salt **1** in 1700 – 2200 cm<sup>-1</sup> range in KBr pellets prepared in anaerobic conditions

## Crystal structure

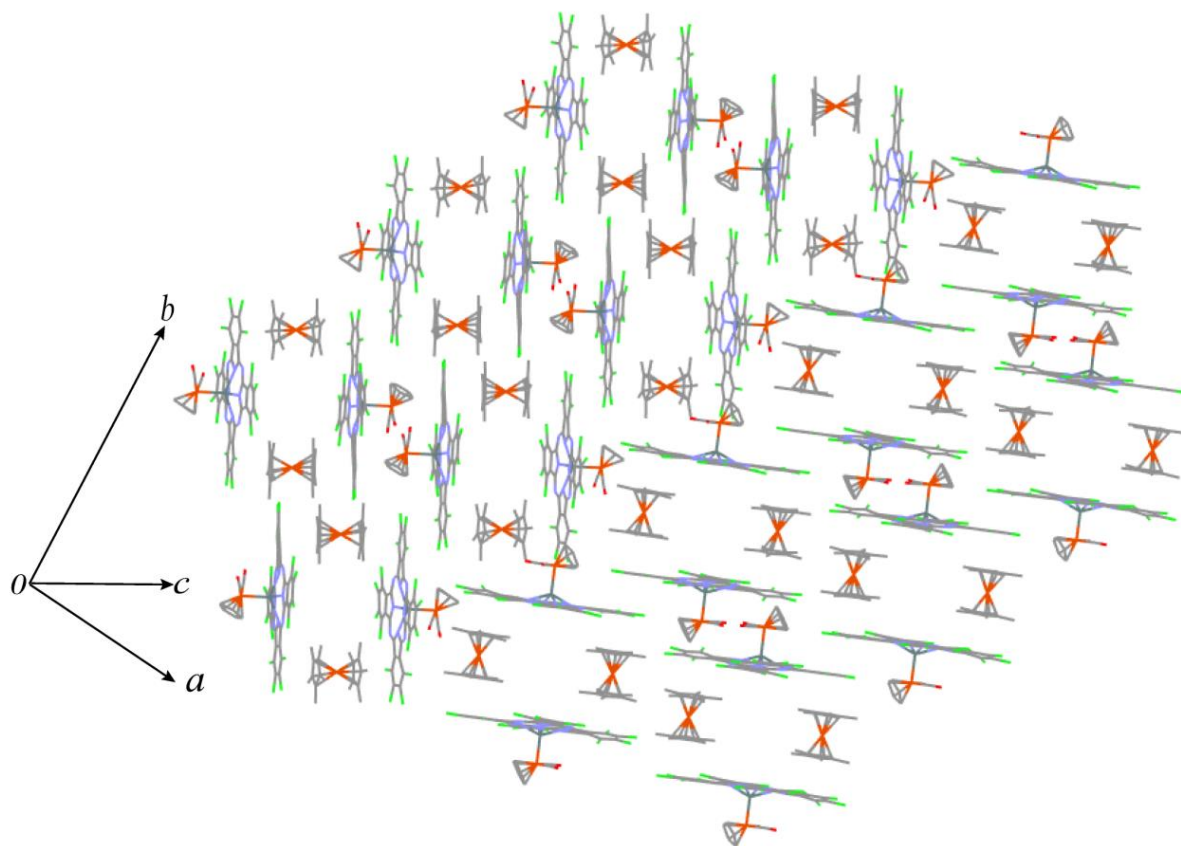

**Figure S3.** Structure of two types of the layers from sandwiches in  $(\text{Cp}^*_2\text{Cr}^{\text{III}})^+\{\text{CpFe}^{\text{II}}(\text{CO})_2(\text{Sn}^{\text{II}}[\text{PcCl}_{16}]^{4-})\}^-$  (**1**)

## Magnetic properties

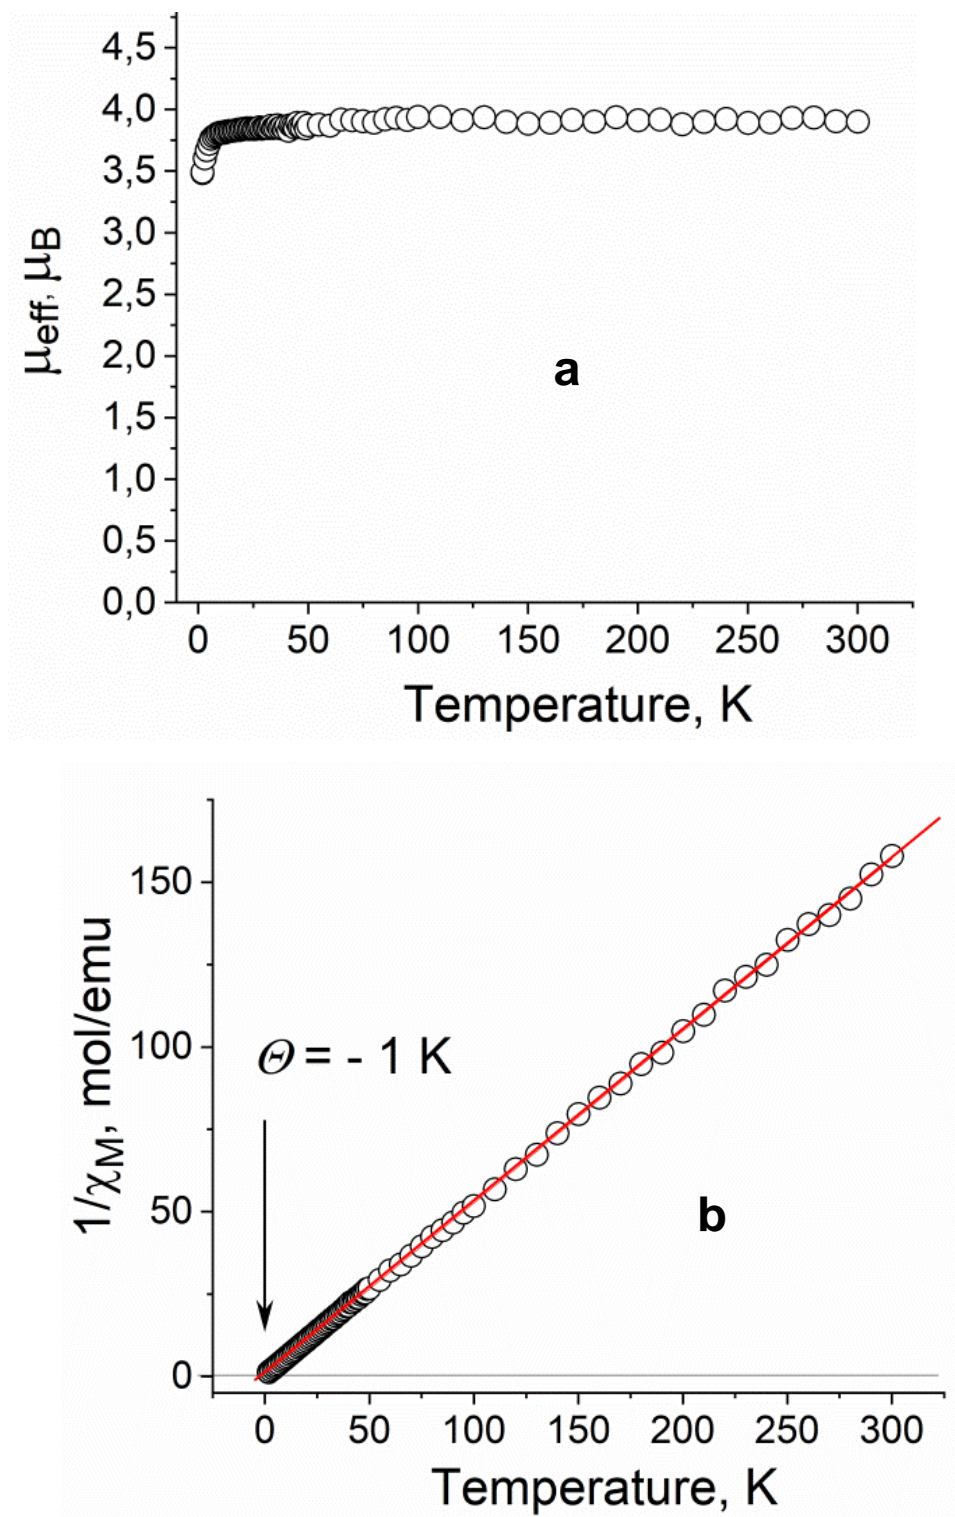

**Figure S4.** Temperature dependence of effective magnetic moment (a) and reciprocal molar magnetic susceptibility (b) for  $(\text{Cp}_2\text{Cr}^{\text{III}})^+\{\text{CpFe}^{\text{II}}(\text{CO})_2(\text{Sn}^{\text{II}}[\text{PcCl}_{16}]^{4-})\}^-$  (**1**).

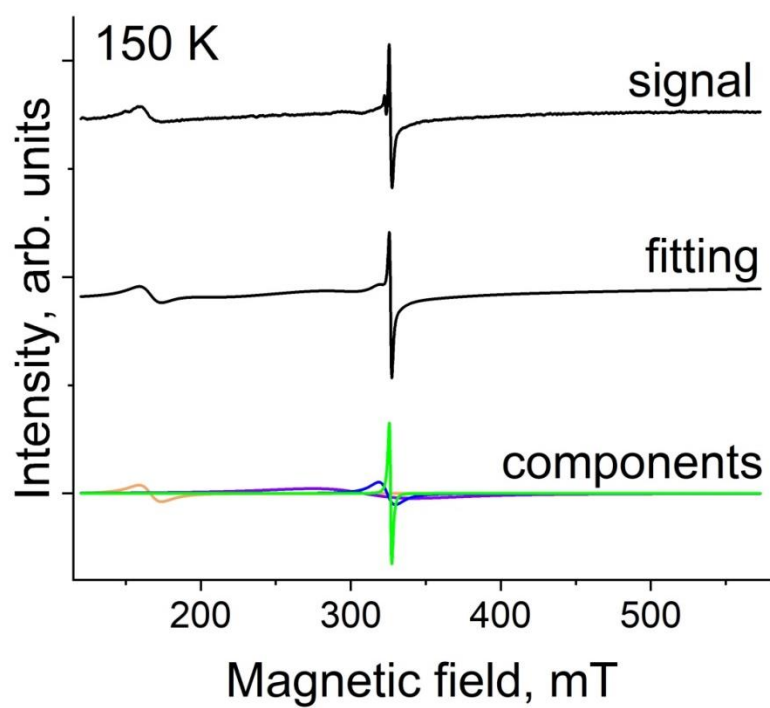

**Figure S5.** EPR spectrum of the polycrystalline sample of **1** measured in an anaerobic condition.
